# Supplementary material
Source: Springer Nature journal article supplement (https://www.springermedizin.de/resource/supplementary/13054_2012_678_MOESM6_ESM.pdf/9708996)

| Study                                           | Telemedicine |              | Control    |             | Weight        | Risk Ratio<br>[95% CI]   |
|-------------------------------------------------|--------------|--------------|------------|-------------|---------------|--------------------------|
|                                                 | Events       | Total        | Events     | Total       |               |                          |
| <b>High intensity passive or active systems</b> |              |              |            |             |               |                          |
| Breslow et al., 2004                            | 47           | 744          | 120        | 1396        | 14.7%         | 0.73 [0.53, 1.02]        |
| Kohl et al., 2007                               | 81           | 2622         | 16         | 189         | 9.2%          | 0.36 [0.22, 0.61]        |
| Thomas et al., 2009                             | 165          | 2108         | 188        | 2034        | 19.4%         | 0.85 [0.69, 1.03]        |
| McCambridge et al., 2010                        | 110          | 959          | 151        | 954         | 18.3%         | 0.72 [0.58, 0.91]        |
| Morrison et al., 2010                           | 208          | 2717         | 91         | 1371        | 18.0%         | 1.15 [0.91, 1.46]        |
| Lilly et al., 2011                              | 410          | 4761         | 164        | 1529        | 20.4%         | 0.80 [0.68, 0.95]        |
| <b>Total</b>                                    | <b>1021</b>  | <b>13911</b> | <b>730</b> | <b>7473</b> | <b>100.0%</b> | <b>0.78 [0.64, 0.95]</b> |

**Overall effect:  $p=0.01$ ; heterogeneity:  $I^2=74\%$**

|                                      |           |            |           |             |               |                          |
|--------------------------------------|-----------|------------|-----------|-------------|---------------|--------------------------|
| <b>Low intensity passive systems</b> |           |            |           |             |               |                          |
| Rosenfeld et al., 2000               | 3         | 201        | 29        | 427         | 33.2%         | 0.22 [0.07, 0.71]        |
| Marcin et al., 2004                  | 1         | 47         | 5         | 249         | 19.0%         | 1.06 [0.13, 8.87]        |
| Vespa et al., 2007                   | 70        | 640        | 58        | 578         | 47.7%         | 1.09 [0.78, 1.52]        |
| <b>Total</b>                         | <b>74</b> | <b>888</b> | <b>92</b> | <b>1254</b> | <b>100.0%</b> | <b>0.64 [0.20, 2.07]</b> |

**Overall effect:  $p=0.45$ ; heterogeneity:  $I^2=71\%$**

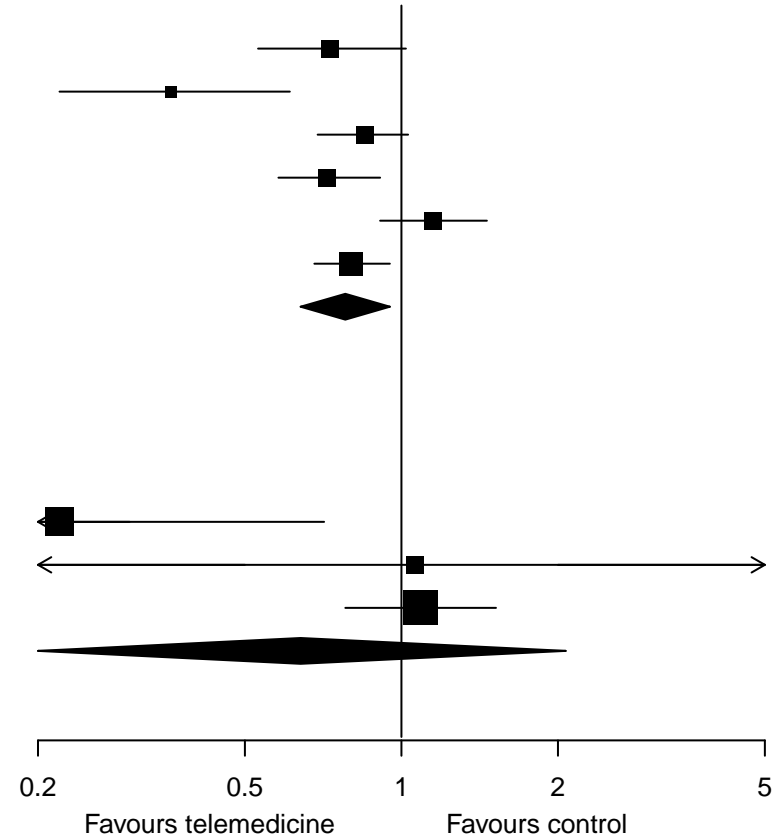

Supplement: MOESM6 [file 9708996]
